# Supplementary material for: The Ultrasensitive Detection of Aflatoxin M1 Using Gold Nanoparticles Modified Electrode with Fe3+ as a Probe
Source: MDPI journal article supplement (doi:10.3390/foods12132521), 2023-06-28
Supplement: s1 [file s1]

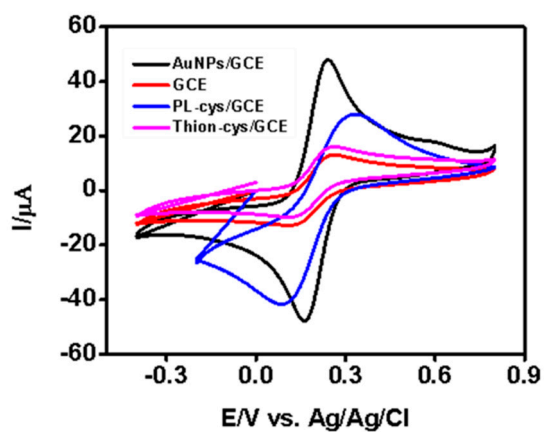

Figure S1. CV response of different modified electrodes in  $\text{Fe}^{3+}$  and  $\text{AFM}_1$

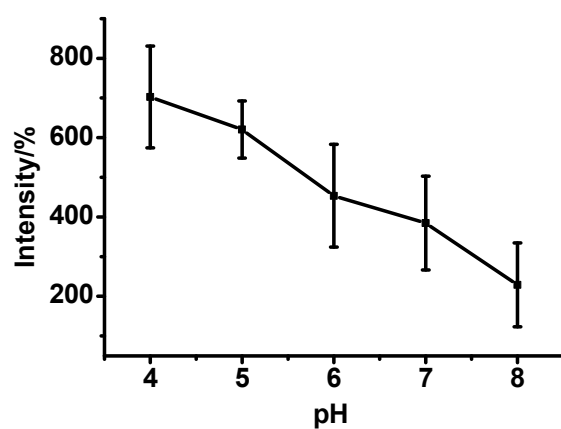

Figure S2. Effect of pH on fluorescence spectrum intensity.

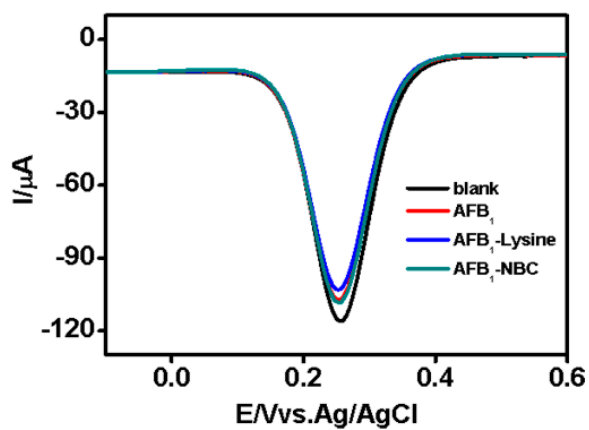

Figure S3. The DPV response of  $\text{AFB}_1$ ,  $\text{AFB}_1\text{-NAC}$ , and  $\text{AFB}_1\text{-lysine}$  respectively at  $\text{AuNPs/GCE}$ .

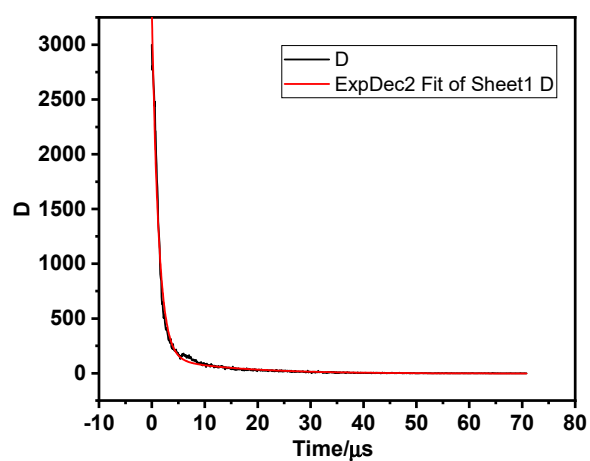

**Figure S4.** The second-order fitting curve of transient fluorescence spectra.

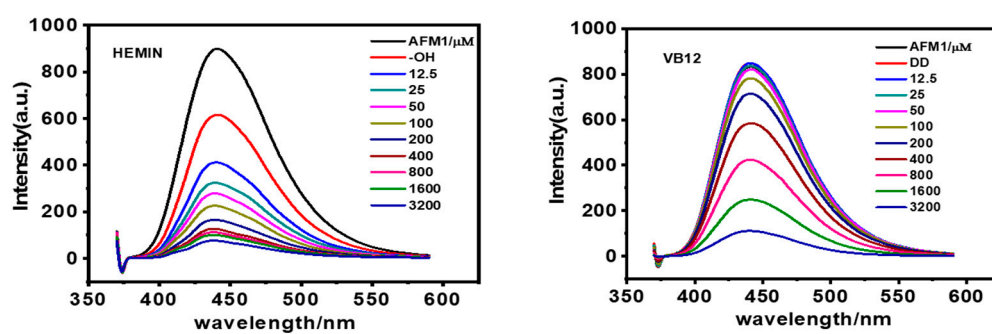

**Figure S5.** Fluorescence intensity at different concentrations of heme iron and VB<sub>12</sub>.
